# Supplementary material for: Modulation of band alignment with water redox potentials by biaxial strain on orthorhombic NaTaO3thin films
Source: Royal Society of Chemistry journal article supplement (doi:10.1039/d0cp04322b), 2020-01-01
Supplement: d0cp04322b1.pdf [file d0cp04322b1.pdf]

## ESI: Modulation of band alignment with water redox potentials by biaxial strain on orthorhombic NaTaO<sub>3</sub> thin film

Alexandre Olivieri Kraus, Guilherme Ribeiro Portugal, and Jeverson Teodoro Arantes<sup>a</sup>

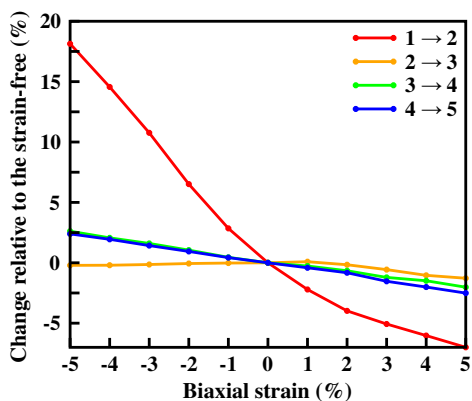

S.1 The change on the interlayer distance with the biaxial strain emphasizing the sensitivity of the two outermost layers to strain. In legend, the distance 1 → 2 measures the distance between the surface and subsurface layers, 2 → 3 the one between the subsurface and the first bulk-like layer. Distances 3 → 4, 4 → 5 are measured between the layers inside the bulk-like region.

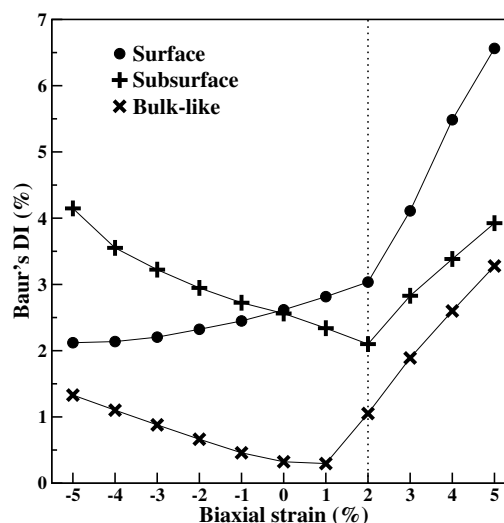

S.3 The change in the Baur's distortion index with biaxial strain emphasizing the inflection point at 2%. Further increases in tension lead to a more severe distortion of the overall thin film structure.

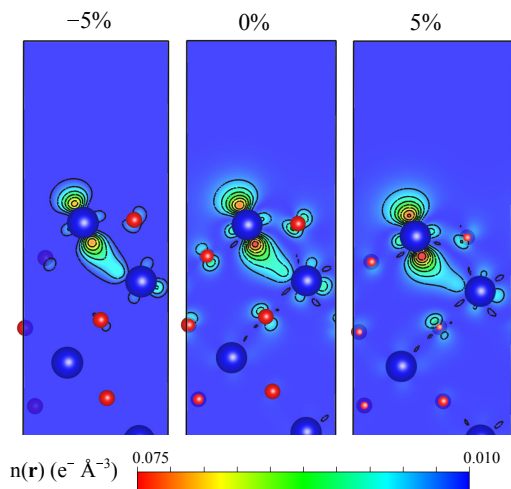

S.2 The charge density  $n(\mathbf{r})$  of the surface states evaluated at each strain state. The level curves clearly show the  $5d_{3z^2-r^2} - 5d_{yz}$  overlap between surface and subsurface Ta  $5d$  and their increase with tension.

The compressive strain increases the energetic gaps, while the tensile strain initially decreases them. For biaxial strain values higher than 2%, both the bandgap and the defect gap increase with the tension. The change in the reduction trend at the 2% mark comes from the distortions of the TaO<sub>6</sub> octahedra (bulk-like and subsurface) and TaO<sub>4</sub> surface tetrahedra evaluated with the Baur's distortion index<sup>1</sup>:

$$DI = \frac{1}{N} \sum_{i=1}^N \frac{|l_i - \langle l \rangle|}{\langle l \rangle},$$

where  $l_i$  is the Ta-O bond distance,  $\langle l \rangle$  the average bond distance, and  $N = 4$  (6) for the surface (subsurface) polyhedra. Although the electrostatic repulsion on Ta  $5d$  orbitals keeps decreasing with the tensile increase, the distortion of Ta polyhedra changes the steric interactions related to non-bonding  $5d$  orbitals. Again from the crystal field picture, the energy levels of Ta  $5d$  orbitals are minimal in the octahedral symmetry because there are no interactions between O  $2p$  with Ta non-bonding  $5d_{xy}$ ,  $5d_{yz}$  and  $5d_{xz}$  orbitals. As the ligands depart from the pristine octahedral configuration, the repulsive O $2p$ -Ta $5d$  interactions increase, increasing the energy levels of the involved  $5d$  states. The overall effect is the compensation of the Ta-O distance elongation on the energy levels.

### Notes and references

- 1 W. H. Baur, *Acta Crystallographica Section B Structural Crystallography and Crystal Chemistry*, 1974, **30**, 1195–1215.

<sup>a</sup> E-mail: jeverson.teodoro@ufabc.edu.br

Center for Engineering, Modeling and Applied Social Sciences - CECS, Federal University of ABC - UFABC, Santo André - SP, Brazil
